# Supplementary material for: Cross-basin and cross-taxa patterns of marine community tropicalization and deborealization in warming European seas
Source: PubMed Central journal article supplement (PMC10923825; doi:10.1038/s41467-024-46526-y), 2024-03-08
Supplement: 41467_2024_46526_MOESM3_ESM.pdf [file 41467_2024_46526_MOESM3_ESM.pdf]

## **Description of Additional Supplementary Files**

Title: Supplementary Data 1

Description: Biodiversity time series datasets. Information of trends in sea temperature, CTIr, and underlying processes.
